# Supplementary material for: Relating simulation studies by provenance—Developing a family of Wnt signaling models
Source: PubMed Central journal article supplement (PMC8407594; doi:10.1371/journal.pcbi.1009227), 2021-08-05
Supplement: pcbi.1009227.s001.pdf [file pcbi.1009227.s001.pdf]

# Supporting Information: Relating simulation studies by provenance—Developing a family of Wnt signaling models

Kai Budde (kai.budde@uni-rostock.de)

July 9, 2021

## 1 List of names and references of studies shown in provenance graphs

This list shows the names used in the provenance graphs as well as the corresponding references.

### Wnt simulation studies:

- Chen et al. 2014 [1]
- Cho et al. 2006 [2]
- Goldbeter and Pourquié 2008 [3]
- Haack et al. 2015 [4]
- Haack et al. 2020 [5]
- Kim et al. 2007 [6]
- Kogan et al. 2012 [7]
- Krüger and Heinrich 2004 [8]
- Lee et al. 2001 [9]
- Mazemondet et al. 2012 [10]
- Mirams et al. 2010 [11]
- Padala et al. 2017 [12]
- Rodriguez et al. 2007 [13]
- Sick et al. 2006 [14]
- Staehlke et al. 2020 [15]
- van Leeuwen et al. 2007 [16]
- van Leeuwen et al. 2009 [17]
- Wang et al. 2013 [18]
- Wawra et al. 2007 [19]

**Additionally used studies:**

- Bafico et al. 2001 [20]
- Bernard et al. 2006 [21]
- Bourhis et al. 2010 [22]
- Brown et al. 2004 [23]
- Cho et al. 2003 [24]
- Dajani et al. 2003 [25]
- Dequeant et al. 2006 [26]
- Galli et al. 2006 [27]
- Goh and Sorkin 2013 [28]
- Hannoush 2008 [29]
- Hernandez et al. 2012 [30]
- Hirata et al. 2004 [31]
- Howard et al. 2001 [32]
- Jho et al. 2002 [33]
- Kim et al. 2006 [34]
- Kim et al. 2013 [35]
- Krieghoff et al. 2006 [36]
- Lee et al. 2001 [9]
- Lewis 2003 [37]
- Mazemondet et al. 2011 [38]
- Meineke et al. 2001 [39]
- Monk 2003 [40]
- Orton et al. 2009 [41]
- Pralle et al. 2000 [42]
- Prior et al. 2003 [43]
- Rida et al. 2004 [44]
- Sakane et al. 2010 [45]
- Salic et al. 2000 [46]
- Swat et al. 2004 [47]
- Wawrzak et al. 2007 [48]
- Yamamoto et al. 2006 [49]
- Yamamoto et al. 2008 [50]

## References

- [1] Chen J, Xie ZR, Wu Y. Computational Modeling of the Interplay between Cadherin-Mediated Cell Adhesion and Wnt Signaling Pathway. *PLoS ONE*. 2014;9(6):e100702. doi:10.1371/journal.pone.0100702.
- [2] Cho KH, Baek S, Sung MH. Wnt pathway mutations selected by optimal  $\beta$ -catenin signaling for tumorigenesis. *FEBS Letters*. 2006;580(15):3665–3670. doi:10.1016/j.febslet.2006.05.053.
- [3] Goldbeter A, Pourquié O. Modeling the segmentation clock as a network of coupled oscillations in the Notch, Wnt and FGF signaling pathways. *Journal of Theoretical Biology*. 2008;252(3):574–585. doi:10.1016/j.jtbi.2008.01.006.
- [4] Haack F, Lemcke H, Ewald R, Rharass T, Uhrmacher AM. Spatio-temporal Model of Endogenous ROS and Raft-Dependent WNT/Beta-Catenin Signaling Driving Cell Fate Commitment in Human Neural Progenitor Cells. *PLoS Computational Biology*. 2015;11(3):e1004106. doi:10.1371/journal.pcbi.1004106.
- [5] Haack F, Budde K, Uhrmacher AM. Exploring the mechanistic and temporal regulation of LRP6 endocytosis in canonical WNT signaling. *Journal of Cell Science*. 2020;133(15). doi:10.1242/jcs.243675.
- [6] Kim D, Rath O, Kolch W, Cho KH. A hidden oncogenic positive feedback loop caused by crosstalk between Wnt and ERK pathways. *Oncogene*. 2007;26(31):4571–4579. doi:10.1038/sj.onc.1210230.
- [7] Kogan Y, Halevi-Tobias KE, Hochman G, Baczmanska AK, Leyns L, Agur Z. A new validated mathematical model of the Wnt signalling pathway predicts effective combinational therapy by sFRP and Dkk. *Biochemical Journal*. 2012;444(1):115–125. doi:10.1042/BJ20111887.
- [8] Krüger R, Heinrich R. Model reduction and analysis of robustness for the Wnt/ $\beta$ -catenin signal transduction pathway. *Genome Informatics*. 2004;15(1):138–148. doi:10.11234/gi1990.15.138.
- [9] Lee E, Salic A, Kirschner MW. Physiological regulation of  $\beta$ -catenin stability by Tcf3 and CK1 $\epsilon$ . *Journal of Cell Biology*. 2001;154(5):983–994. doi:10.1083/jcb.200102074.
- [10] Mazemondet O, John M, Leye S, Rolfs A, Uhrmacher AM. Elucidating the Sources of  $\beta$ -Catenin Dynamics in Human Neural Progenitor Cells. *PLoS ONE*. 2012;7(8):e42792. doi:10.1371/journal.pone.0042792.
- [11] Mirams GR, Byrne HM, King JR. A multiple timescale analysis of a mathematical model of the Wnt/ $\beta$ -catenin signalling pathway. *Journal of Mathematical Biology*. 2010;60(1):131–160. doi:10.1007/s00285-009-0262-y.
- [12] Padala RR, Karnawat R, Viswanathan SB, Thakkar AV, Das AB. Cancerous perturbations within the ERK, PI3K/Akt, and Wnt/ $\beta$ -catenin signaling network constitutively activate inter-pathway positive feedback loops. *Molecular BioSystems*. 2017;13(5):830–840. doi:10.1039/C6MB00786D.
- [13] Rodríguez-González J, Santillán M, Fowler A, Mackey MC. The segmentation clock in mice: interaction between the Wnt and Notch signalling pathways. *Journal of theoretical biology*. 2007;248(1):37–47. doi:10.1016/j.jtbi.2007.05.003.
- [14] Sick S, Reinker S, Timmer J, Schlake T. WNT and DKK determine hair follicle spacing through a reaction-diffusion mechanism. *Science*. 2006;314(5804):1447–1450. doi:10.1126/science.1130088.
- [15] Staehlke S, Haack F, Waldner AC, Koczan D, Moerke C, Mueller P, et al. ROS Dependent Wnt/ $\beta$ -Catenin Pathway and Its Regulation on Defined Micro-Pillars—A Combined In Vitro and In Silico Study. *Cells*. 2020;9(8):1784. doi:10.3390/cells9081784.

- [16] van Leeuwen IMM, Byrne HM, Jensen OE, King JR. Elucidating the interactions between the adhesive and transcriptional functions of  $\beta$ -catenin in normal and cancerous cells. *Journal of Theoretical Biology*. 2007;247(1):77–102. doi:10.1016/j.jtbi.2007.01.019.
- [17] van Leeuwen IMM, Mirams GR, Walter A, Fletcher A, Murray P, Osborne J, et al. An integrative computational model for intestinal tissue renewal. *Cell Proliferation*. 2009;42(5):617–636. doi:10.1111/j.1365-2184.2009.00627.x.
- [18] Wang Hy, Huang Yx, Qi Yf, Zhang Y, Bao Yl, Sun Lg, et al. Mathematical models for the Notch and Wnt signaling pathways and the crosstalk between them during somitogenesis. *Theoretical Biology and Medical Modelling*. 2013;10(1):27. doi:10.1186/1742-4682-10-27.
- [19] Wawra C, Kühl M, Kestler HA. Extended analyses of the Wnt/ $\beta$ -catenin pathway: Robustness and oscillatory behaviour. *FEBS Letters*. 2007;581(21):4043–4048. doi:10.1016/j.febslet.2007.07.043.
- [20] Bafico A, Liu G, Yaniv A, Gazit A, Aaronson SA. Novel mechanism of Wnt signalling inhibition mediated by Dickkopf-1 interaction with LRP6/Arrow. *Nature Cell Biology*. 2001;3(7):683–686. doi:10.1038/35083081.
- [21] Bernard S, Čajavec B, Pujo-Menjouet L, Mackey MC, Herzel H. Modelling transcriptional feedback loops: the role of Gro/TLE1 in Hes1 oscillations. *Philosophical Transactions of the Royal Society A: Mathematical, Physical and Engineering Sciences*. 2006;364(1842):1155–1170. doi:10.1098/rsta.2006.1761.
- [22] Bourhis E, Tam C, Franke Y, Bazan JF, Ernst J, Hwang J, et al. Reconstitution of a Frizzled8-Wnt3a-LRP6 Signaling Complex Reveals Multiple Wnt and Dkk1 Binding Sites on LRP6. *Journal of Biological Chemistry*. 2010;285(12):9172–9179. doi:10.1074/jbc.M109.092130.
- [23] Brown KS, Hill CC, Calero GA, Myers CR, Lee KH, Sethna JP, et al. The statistical mechanics of complex signaling networks: nerve growth factor signaling. *Physical Biology*. 2004;1(3):184–195. doi:10.1088/1478-3967/1/3/006.
- [24] Kwang-Hyun C, Sung-Young S, Hyun-Woo K, Wolkenhauer O, McFerran B, Kolch W. Mathematical Modeling of the Influence of RKIP on the ERK Signaling Pathway. In: Priami C, editor. *Computational Methods in Systems Biology*. Berlin, Heidelberg: Springer Berlin Heidelberg; 2003. p. 127–141.
- [25] Dajani R, Fraser E, Roe SM, Yeo M, Good VM, Thompson V, et al. Structural basis for recruitment of glycogen synthase kinase 3 $\beta$  to the axin-APC scaffold complex. *The EMBO Journal*. 2003;22(3):494–501. doi:10.1093/emboj/cdg068.
- [26] Dequéant ML, Glynn E, Gaudenz K, Wahl M, Chen J, Mushegian A, et al. A Complex Oscillating Network of Signaling Genes Underlies the Mouse Segmentation Clock. *Science*. 2006;314(5805):1595–1598. doi:10.1126/science.1133141.
- [27] Galli LM, Barnes T, Cheng T, Acosta L, Anglade A, Willert K, et al. Differential inhibition of Wnt-3a by Sfrp-1, Sfrp-2, and Sfrp-3. *Developmental Dynamics*. 2006;235(3):681–690. doi:10.1002/dvdy.20681.
- [28] Goh LK, Sorkin A. Endocytosis of Receptor Tyrosine Kinases. *Cold Spring Harbor Perspectives in Biology*. 2013;5(5):a017459–a017459. doi:10.1101/cshperspect.a017459.
- [29] Hannoush RN. Kinetics of Wnt-driven  $\beta$ -catenin stabilization revealed by quantitative and temporal imaging. *PLoS ONE*. 2008;3(10). doi:10.1371/journal.pone.0003498.
- [30] Hernández AR, Klein AM, Kirschner MW. Kinetic Responses of  $\beta$ -Catenin Specify the Sites of Wnt Control. *Science*. 2012;338(6112):1337–1340. doi:10.1126/science.1228734.

- [31] Hirata H, Bessho Y, Kokubu H, Masamizu Y, Yamada S, Lewis J, et al. Instability of Hes7 protein is crucial for the somite segmentation clock. *Nature Genetics*. 2004;36(7):750—754. doi:10.1038/ng1372.
- [32] Howard J, et al. *Mechanics of motor proteins and the cytoskeleton*. vol. 743. Sinauer associates Sunderland, MA; 2001.
- [33] Jho Eh, Zhang T, Domon C, Joo CK, Freund JN, Costantini F. Wnt/ $\beta$ -Catenin/Tcf Signaling Induces the Transcription of Axin2, a Negative Regulator of the Signaling Pathway. *Molecular and Cellular Biology*. 2002;22(4):1172–1183. doi:10.1128/MCB.22.4.1172-1183.2002.
- [34] Kim S, Xu X, Hecht A, Boyer TG. Mediator Is a Transducer of Wnt/ $\beta$ -Catenin Signaling\*. *Journal of Biological Chemistry*. 2006;281(20):14066–14075. doi:10.1074/jbc.M602696200.
- [35] Kim SE, Huang H, Zhao M, Zhang X, Zhang A, Semonov MV, et al. Wnt Stabilization of  $\beta$ -Catenin Reveals Principles for Morphogen Receptor-Scaffold Assemblies. *Science*. 2013;340(6134):867–870. doi:10.1126/science.1232389.
- [36] Kriehoff E, Behrens J, Mayr B. Nucleo-cytoplasmic distribution of  $\beta$ -catenin is regulated by retention. *Journal of Cell Science*. 2006;119(7):1453–1463. doi:10.1242/jcs.02864.
- [37] Lewis J. Autoinhibition with Transcriptional Delay: A Simple Mechanism for the Zebrafish Somitogenesis Oscillator. *Current Biology*. 2003;13(16):1398–1408. doi:10.1016/S0960-9822(03)00534-7.
- [38] Mazemondet O, Hubner R, Frahm J, Koczan D, Bader B, Weiss D, et al. Quantitative and kinetic profile of Wnt/ $\beta$ -catenin signaling components during human neural progenitor cell differentiation. *Cellular and Molecular Biology Letters*. 2011;16(4):515—538. doi:10.2478/s11658-011-0021-0.
- [39] Meineke FA, Potten CS, Loeffler M. Cell migration and organization in the intestinal crypt using a lattice-free model. *Cell Proliferation*. 2001;34(4):253–266. doi:10.1046/j.0960-7722.2001.00216.x.
- [40] Monk NAM. Oscillatory Expression of Hes1, p53, and NF- $\kappa$ B Driven by Transcriptional Time Delays. *Current Biology*. 2003;13(16):1409–1413. doi:10.1016/S0960-9822(03)00494-9.
- [41] Orton RJ, Adriaens ME, Gormand A, Sturm OE, Kolch W, Gilbert DR. Computational modelling of cancerous mutations in the EGFR/ERK signalling pathway. *BMC Systems Biology*. 2009;3(1):100. doi:10.1186/1752-0509-3-100.
- [42] Pralle A, Keller P, Florin EL, Simons K, Hörber JKH. Sphingolipid–Cholesterol Rafts Diffuse as Small Entities in the Plasma Membrane of Mammalian Cells. *Journal of Cell Biology*. 2000;148(5):997—1008. doi:10.1083/jcb.148.5.997.
- [43] Prior IA, Muncke C, Parton RG, Hancock JF. *Journal of Cell Biology*. 2003;160(2):165—170. doi:10.1083/jcb.200209091.
- [44] Rida PCG, Le Minh N, Jiang YJ. A Notch feeling of somite segmentation and beyond. *Developmental Biology*. 2004;265(1):2–22. doi:10.1016/j.ydbio.2003.07.003.
- [45] Sakane H, Yamamoto H, Kikuchi A. LRP6 is internalized by Dkk1 to suppress its phosphorylation in the lipid raft and is recycled for reuse. *Journal of Cell Science*. 2010;123(3):360–368. doi:10.1242/jcs.058008.
- [46] Salic A, Lee E, Mayer L, Kirschner MW. Control of Beta-Catenin Stability: Reconstitution of the Cytoplasmic Steps of the Wnt Pathway in Xenopus Egg Extracts. *Molecular Cell*. 2000; p. 10. doi:10.1016/S1097-2765(00)80446-3.
- [47] Swat M, Kel A, Herzog H. Bifurcation analysis of the regulatory modules of the mammalian G1/S transition. *Bioinformatics*. 2004;20(10):1506–1511. doi:10.1093/bioinformatics/bth110.

- [48] Wawrzak D, Métioui M, Willems E, Hendrickx M, de Genst E, Leyns L. Wnt3a binds to several sFRPs in the nanomolar range. *Biochemical and Biophysical Research Communications*. 2007;357(4):1119–1123. doi:10.1016/j.bbrc.2007.04.069.
- [49] Yamamoto H, Komekado H, Kikuchi A. Caveolin Is Necessary for Wnt-3a-Dependent Internalization of LRP6 and Accumulation of  $\beta$ -Catenin. *Developmental Cell*. 2006;11(2):213–223. doi:10.1016/j.devcel.2006.07.003.
- [50] Yamamoto H, Sakane H, Yamamoto H, Michiue T, Kikuchi A. Wnt3a and Dkk1 Regulate Distinct Internalization Pathways of LRP6 to Tune the Activation of  $\beta$ -Catenin Signaling. *Developmental Cell*. 2008;15(1):37–48. doi:10.1016/j.devcel.2008.04.015.
